# Supplementary material
Source: publisher site journal article supplement (https://www.spandidos-publications.com/2702/downloadSupplementary)
Supplement: Supplementary file 1 [file downloadSupplementary]

## Sheet: Sheet1
Table SII. NFPA‐dysregulated lncRNA‐mRNA network.
Source nodes	Target nodes
SSX2IP	ZNF250
SSX2IP	TRIM54
SSX2IP	SYT17
SSX2IP	WDR5
SSX2IP	SSX3
SSX2IP	ZBTB24
SSX2IP	ZSCAN12
SSX2IP	TOP3B
SSX2IP	ZRSR2
SSX2IP	ZNF124
SSX2IP	ZNF3
SSX2IP	TEAD4
SSX2IP	TBP
SSX2IP	XIAP
SSX2IP	USP11
SSX2IP	TFIP11
SSX2IP	ZGPAT
SSX2IP	ZNF71
SSX2IP	ZFYVE26
SSX2IP	TBC1D31
SSX2IP	VCPIP1
SSX2IP	TRIP6
SSX2IP	TRIM9
SSX2IP	TRIM37
SSX2IP	TNRC6C
SSX2IP	TNRC6A
SSX2IP	TNIP1
SSX2IP	TBK1
SSX2IP	TAB1
SSX2IP	XRN1
SSX2IP	WDR83
SSX2IP	TXLNG
SSX2IP	TTK
SSX2IP	TRIM26
SSX2IP	TPGS1
SSX2IP	TP53BP2
SSX2IP	TP53
SSX2IP	TNRC6B
SSX2IP	TCHP
SSX2IP	TUBB2A
SSX2IP	TUBA1A
SSX2IP	WRAP73
SSX2IP	TRIM42
SSX2IP	ZMAT2
SSX2IP	ZNF417
SSX2IP	ZNF792
SSX2IP	YWHAQ
SSX2IP	YWHAZ
MLLT4	SH3PXD2A
MLLT4	NOTCH2
MLLT4	SSX2IP
PTK2B	SOCS3
LRP1	MMP14
CTSB	HIST1H1D
CTSB	LUM
CTSB	SPRY2
ANXA2	CDC42
ANXA2	S100A6
ANXA2	KIAA1429
ANXA2	WTAP
ANXA2	METTL14
ANXA2	METTL3
ANXA2	KRT17
ANXA2	NEK2
ANXA2	PTPN11
ANXA2	RECQL4
ANXA2	PPT1
ANXA2	EGFR
ANXA2	HEXIM1
ANXA2	NOD2
ANXA2	ZUFSP
ANXA2	PRKCZ
ANXA2	CHD4
ANXA2	CHD3
ANXA2	PIH1D1
ANXA2	EFTUD2
ANXA2	PRPF8
ANXA2	GALE
ANXA2	TMPO
ANXA2	ZNF598
ANXA2	NA
ANXA2	RSC1A1
ANXA2	UBE2A
ANXA2	TRIM25
ANXA2	SOAT1
ANXA2	PDHA1
ANXA2	HSD17B10
ANXA2	DLST
ANXA2	CYLD
ANXA2	CDH1
ANXA2	CDC73
ANXA2	RAB14
ANXA2	U2AF2
ANXA2	ESRRB
ANXA2	ERRFI1
ANXA2	ERBB3
ANXA2	MCM5
ANXA2	MCM2
ANXA2	FBXL12
ANXA2	Ca
ANXA2	F
ANXA2	MYO18A
ANXA2	MYO19
ANXA2	LIMA1
ANXA2	SYNPO
ANXA2	IQGAP1
ANXA2	PPP1CB
ANXA2	MYH9
ANXA2	FLNA
ANXA2	DBN1
ANXA2	PTEN
ANXA2	NTRK1
ANXA2	RAB7A
ANXA2	PRDX2
ANXA2	NCKAP1L
ANXA2	LGALS1
ANXA2	FUBP1
ANXA2	CACYBP
ANXA2	HNRNPA1
ANXA2	RPS6KB2
ANXA2	MAP1S
ANXA2	SIRT6
ANXA2	CCDC8
ANXA2	OBSL1
ANXA2	CUL7
ANXA2	SPRTN
ANXA2	ASB9
ANXA2	WWOX
ANXA2	RPA1
ANXA2	RPA2
ANXA2	RPA3
ANXA2	PARK2
ANXA2	YWHAQ
ANXA2	ATP4A
ANXA2	BAG3
ANXA2	TERT
ANXA2	NPM1
ANXA2	TP53
ANXA2	ITGA4
ANXA2	IQCB1
ANXA2	VCAM1
ANXA2	FN1
ANXA2	VCP
ANXA2	HNF1A
ANXA2	ESR1
ANXA2	SHC1
ANXA2	CDK9
ANXA2	MYOC
ANXA2	CD99
ANXA2	MID1
ANXA2	PPP2R1A
ANXA2	CDK2
ANXA2	CUL2
ANXA2	POT1
ANXA2	TERF1
ANXA2	SP1
ANXA2	ARRB2
ANXA2	ARRB1
ANXA2	Ksr1
ANXA2	UBE3A
ANXA2	EP300
ANXA2	NCOA3
ANXA2	CDK7
ANXA2	CD4
ANXA2	H2AFX
ANXA2	MGMT
ANXA2	PCNA
ANXA2	GRB2
ANXA2	SOS1
ANXA2	PHB
ANXA2	TRPV5
ANXA2	CEACAM1
ANXA2	PPM1B
ANXA2	LGALS13
ANXA2	S100A4
ANXA2	PLA1A
ANXA2	LYPLA1
ANXA2	DYSF
ANXA2	SRC
ANXA2	PRKCB
ANXA2	PRKCA
ANXA2	PLG
ANXA2	MAP3K4
ANXA2	MYC
ANXA2	PAPD4
ANXA2	C15orf57
ANXA2	OGDH
ANXA2	ZBTB4
ANXA2	RPS2
ANXA2	CTSS
ANXA2	SNX17
ANXA2	STAT3
ANXA2	KLHL42
ANXA2	PDCD6
ANXA2	PCBP2
ANXA2	EWSR1
ANXA2	PLA2G4A
ANXA2	LOC100128588
ANXA2	DNAJC8
ANXA2	HMGA1
ANXA2	MLH1
ANXA2	RPL11
ANXA2	RPS13
ANXA2	GNB2L1
ANXA2	APP
ANXA2	ISG15
ANXA2	gag
ANXA2	STAT6
ANXA2	S100A10
ANXA2	APOH
ANXA2	PLAT
ANXA2	CTSB
MYCL	TAF9
MYCL	RUVBL2
MYCL	RUVBL1
MYCL	TAF5L
MYCL	NAGK
MYCL	SUPT20H
MYCL	SUPT7L
MYCL	YEATS4
MYCL	VPS72
MYCL	TRRAP
MAX	TWIST1
MAX	TFAP2A
MAX	MYCL
PRLR	SOCS3
HGF	LCN2
HGF	MET
EIF2AK2	IFI16
EIF2AK2	ISG15
EIF2AK2	STAT1
PTPN11	RET
PTPN11	STAT1
PTPN11	SOCS3
CSF2RB	EPOR
CSF2RB	IL3RA
CSF2RB	HCK
CSF2RB	SYK
CSF2RB	KIT
CSF2RB	FES
CSF2RB	IL5RA
CSF2RB	LYN
CSF2RB	IL3
CSF2RB	LCK
CSF2RB	FYN
CSF2RB	STAT1
CSF2RB	STAT3
CSF2RB	KDR
CSF2RB	SOCS1
CSF2RB	IKBKB
CSF2RB	JAK1
CSF2RB	MAD2L1
CSF2RB	YWHAZ
CSF2RB	SHC1
CSF2RB	PRKCB
CSF2RB	GNB2L1
CSF2RB	JAK2
CSF2RB	PTPN6
CSF2RB	PTPN11
SOCS3	YES1
SOCS3	TCEB1
SOCS3	YWHAQ
SOCS3	TRDN
SOCS3	TBK1
SOCS3	TXNDC11
SOCS3	TES
SOCS3	TFR2
SOCS3	TFDP1
SOCS3	TNFSF10
SOCS3	VHL
SOCS3	TRAF6
PIN1	SOCS3
STC2	TRIM25
PTN	STC2
CHN2	PTGDS
CHN2	ERBB3
CHN2	RAC1
CHN2	RACGAP1
CHN2	TP53RK
CHN2	SMARCD1
CHN2	RB1
CHN2	RANBP3
BAG6	PALMD
BAG6	RET
BAG6	TES
BAG6	LCK
BAG6	CHN2
FAM101B	TNFRSF10C
TNFRSF10C	TNFSF10
TNFRSF10C	ZHX1
APOA1	SMPDL3A
APOA1	NA
APOA1	TNFRSF10C
KAT7	PACSIN1
ACP5	EGR2
DNAJA1	TES
CD58	ESR2
CD58	RFC4
CD58	EGFR
CD58	LGALS9C
CD58	FUT9
CD58	LGALS9
CD58	LGALS8
CD58	LGALS3
CD58	HERPUD1
CD58	DNAJA1
PPP1CC	STARD9
PPP1CC	TLX1
PPP2CB	SERTAD4
PPP2CB	ZFP36
PPP2CB	TLX1
PPP2CA	SERTAD4
PPP2CA	ZFP36
PPP2CA	TWIST1
PPP2CA	SPRY2
PPP2CA	TLX1
IRF1	vIRF-1
IRF1	PRDM1
IRF1	Tbk1
IRF1	SET
IRF1	SPI1
IRF1	SMARCA4
IRF1	RELA
IRF1	NFKB1
IRF1	XAF1
IRF1	TRAF6
IRF1	IRF2
IRF1	QARS
IRF1	IRF8
IRF1	MDM2
IRF1	SP2
IRF1	TRIM28
IRF1	YBX1
IRF1	NPM1
IRF1	TRMT2A
IRF1	SEC63
IRF1	KEAP1
IRF1	TRAF3
IRF1	STUB1
IRF1	tat
IRF1	IRF9
IRF1	STAT1
IRF1	KAT2A
IRF1	KAT2B
CREBBP	PROX1
CREBBP	IRF1
CREBBP	JUNB
CREBBP	FOSB
CREBBP	NFATC4
CREBBP	EGR1
CREBBP	HNF1B
CREBBP	FOS
CREBBP	KLF4
CREBBP	STAT1
CSNK2A1	TFAP2A
CSNK2A1	IFI16
CSNK2A1	EGR1
CSNK2A1	ISG15
CSNK2A1	FOS
BCL3	STAT1
BCL3	FOS
KAT2B	TWIST1
TWIST1	ZRANB1
TWIST1	VIM
TWIST1	USP17L2
TWIST1	ZIC3
TWIST1	YY2
TWIST1	YY1
TWIST1	WDR5
TWIST1	TWIST2
JUN	SOX10
JUN	SATB2
JUN	NFATC4
JUN	TFAP2A
JUN	JUNB
JUN	STAT1
FOS	NFKB1
FOS	LMNA
FOS	MAPK3
FOS	HIF1A
FOS	UBN1
FOS	HIRA
FOS	NA
FOS	NFATC2
FOS	Psma4
FOS	MAFF
FOS	SIRT1
FOS	UBE2L3
FOS	UBE2D1
FOS	UBE2I
FOS	POLR2E
FOS	MAPK7
FOS	MAZ
FOS	RPS6KA2
FOS	HNF1A
FOS	XBP1
FOS	PML
FOS	RUNX1
FOS	RUNX2
FOS	TAF1
FOS	TBP
FOS	VDR
FOS	MITF
FOS	NACA
FOS	TSC22D3
FOS	SPI1
FOS	RPS6KA4
FOS	NCOA6
FOS	NELFB
FOS	RELA
FOS	GATA4
FOS	NFATC3
FOS	MAP3K7
FOS	SMARCD1
FOS	RPS6KA1
FOS	PRKACA
FOS	TRO
FOS	SCHIP1
FOS	OPTN
FOS	WDR65
FOS	SUMO4
FOS	SUMO3
FOS	SUMO2
FOS	SUMO1
FOS	PIN1
FOS	VEGFA
FOS	IL11
FOS	NFAT5
FOS	KDM2B
FOS	NFATC2IP
FOS	MAPK9
FOS	KHSRP
FOS	FOSB
FOS	TRAPPC13
FOS	SSU72
FOS	PPP1R12A
FOS	KBTBD7
FOS	MTMR1
FOS	SMARCC2
FOS	SMARCC1
FOS	NR2F6
FOS	NR2F1
FOS	NFIX
FOS	SMARCE1
FOS	NFATC1
FOS	TRIB1
FOS	GLO1
FOS	HOXD13
FOS	STAT1
FOS	MED17
FOS	HSD17B4
FOS	YEATS4
FOS	RFWD2
FOS	VARS
FOS	STK40
FOS	LMO3
FOS	LUZP4
FOS	USF2
FOS	USF1
FOS	PSMC5
FOS	PRKAA2
FOS	GNG11
FOS	NQO1
FOS	NEFM
FOS	SET
FOS	HSPA1A
FOS	MTERF4
FOS	MAP1B
FOS	ZNF133
FOS	GLB1
FOS	GAMT
FOS	GRHPR
FOS	TSPAN2
FOS	JUNB
FOS	MAFB
FOS	TCL1A
FOS	SRA1
FOS	RB1
FOS	SMAD3
FOS	MAF
FOS	UBR1
FOS	NCOA3
FOS	NCOA2
FOS	KDM2A
FOS	MAPK1
FOS	JUND
FOS	NCOA1
FOS	NCOR2
FOS	GTF2F1
FOS	GTF2F2
FOS	GTF2E2
FOS	JUN
PLA2G4A	NA
PLA2G4A	TRIM25
PLA2G4A	S100A11
PLA2G4A	STAT3
PLA2G4A	SHBG
PLA2G4A	RPS6KA5
PLA2G4A	SIRT2
PLA2G4A	VIM
PLA2G4A	PRKCA
PLA2G4A	S100A10
PLA2G4A	XAGE1E
PLA2G4A	RELA
PLA2G4A	UBXN1
PLA2G4A	RUVBL2
KAT5	SSX2IP
KAT5	MYCL
KAT5	KLF4
KAT5	PLA2G4A
CITED2	TFAP2A
DEK	TFAP2A
GJA1	LAMP1
GJA1	TGOLN2
GJA1	MB21D1
GJA1	UBE2A
GJA1	TMPRSS3
GJA1	GPR21
GJA1	STS
GJA1	HTR3A
GJA1	UPK1A
GJA1	GPR114
GJA1	HTR3C
GJA1	NA
GJA1	NT5E
GJA1	GPR52
GJA1	TSPAN17
GJA1	KCNK16
GJA1	PSMD4
GJA1	PRKCA
GJA1	S100A1
GJA1	SGSM3
GJA1	MAPK3
GJA1	SRC
GJA1	PRKCG
GJA1	PRKCB
GJA1	NOV
GJA1	MAPK1
GJA1	USP8
GJA1	YWHAZ
GJA1	YWHAQ
GJA1	STXBP1
GJA1	NDUFA7
GJA1	STXBP2
GJA1	STAMBP
GJA1	PSMD2
GJA1	UBQLN4
GJA1	TSG101
GJA1	HGS
GJA1	NEDD4
GJA1	PRKCE
GJA1	TJP1
GJA1	GJA5
GJA1	GJA3
GJA1	MAPK7
SIAH1	ZBP1
DAB1	ITGB5
DAB1	ITGB7
DAB1	PAFAH1B1
DAB1	RELN
DAB1	ITGB2
DAB1	PTPN11
DAB1	ITGB3
DAB1	PLCG1
DAB1	HNRNPL
DAB1	SOCS7
DAB1	SOCS6
DAB1	RBFOX1
DAB1	INPP5D
DAB1	SOCS1
DAB1	MYO6
DAB1	LRP8
DAB1	VLDLR
DAB1	PCDH18
DAB1	DAB2IP
DAB1	SRC
DAB1	LGALS9C
DAB1	KRTAP19-7
DAB1	KRTAP19-5
DAB1	KRTAP8-1
DAB1	LGALS9B
DAB1	TCEANC
DAB1	TMTC3
DAB1	PRR20A
DAB1	ZNF488
DAB1	HNRNPLL
DAB1	NAF1
DAB1	ZC3H10
DAB1	LNX1
DAB1	RHOXF2
DAB1	FAM103A1
DAB1	HMBOX1
DAB1	SMAP2
DAB1	MBNL3
DAB1	STRBP
DAB1	WDYHV1
DAB1	ZCCHC10
DAB1	USP53
DAB1	TOLLIP
DAB1	VENTX
DAB1	ZBTB32
DAB1	RBFOX2
DAB1	FAM168A
DAB1	POGZ
DAB1	SIRPB1
DAB1	SERF2
DAB1	DAZAP2
DAB1	MAGED1
DAB1	PPIG
DAB1	HYAL3
DAB1	TCEA2
DAB1	SNRPB
DAB1	PIN1
DAB1	ROR2
DAB1	MBNL1
DAB1	ERBB3
DAB1	ERBB2
DAB1	SOCS3
DAB1	SH3KBP1
DAB1	LDLR
DAB1	LRP2
DAB1	LRP1
DAB1	SIAH1
SOX10	SUMO3
SOX10	SUMO2
SOX10	SUMO1
SOX10	UBE2I
SOX10	SP1
SOX10	TCF12
SOX10	UTF1
PAX3	SOX10
ENAH	PPM1K
ENAH	TES
ACTA1	MYO10
ACTA1	ANXA2
ACTA1	ISG15
ACTA1	SCIN
ACTA1	TES
TES	UBE2A
TES	TNFAIP8L2
TES	ZSCAN32
TES	VPS25
TES	THRAP3
TES	TLN1
TES	VIM
TES	TFRC
TES	TNKS1BP1
TES	TPM1
TES	UTRN
TES	UBR4
TES	TGFB1I1
TES	TRIM65
TES	TRIM28
TES	USP9X
TES	ZC3HAV1
TES	TKT
TES	TUFM
TES	UNC45A
TES	TRIP13
TES	TRAP1
TES	TTC37
TES	TUBB
TES	TUBA1C
TES	TUBAL3
TES	TUBA1B
TES	TUBB6
TES	TUBB4A
TES	TIMM44
TES	TUBB2A
TES	TRAFD1
TES	TUBB3
TES	TUBB4B
TES	TUBA4A
TES	TOR1AIP2
TES	ZPR1
TES	THADA
TES	ZYX
TES	VASP
RAF1	SPRY2
TNFRSF13C	TNFSF13B
TNFSF13B	VTI1B
TNFSF13B	TNPO2
TNFSF13B	XPO4
TNFSF13B	TTC17
TNFRSF17	TNFSF13B
EGFR	TFAP2A
EGFR	GPNMB
EGFR	SERTAD4
EGFR	NOL6
EGFR	LRRTM4
EGFR	EYS
EGFR	FOS
EGFR	TNFRSF10B
EGFR	SOCS3
EGFR	RET
EGFR	IGFBP2
EGFR	MET
EGFR	OSMR
EGFR	STAT1
EGFR	USP2
EGFR	HBEGF
CIT	RND3
CARD6	RNF31
CARD6	CARD8
CARD6	XK
CARD6	RIPK2
CARD6	NOD1
GSK3B	TMEM132A
GSK3B	SOX10
GSK3B	RCAN1
GSK3B	NOTCH2
PEA15	STIL
PEA15	TERF2IP
PEA15	PLD2
PEA15	PRKCA
PEA15	TJP1
PEA15	TALDO1
PEA15	SON
PEA15	SMEK1
PEA15	SNRPG
PEA15	RSL24D1
PEA15	PUS3
PEA15	PGM1
PEA15	TRAPPC13
PEA15	PLD1
PEA15	RPS6KA3
CTNND1	IFI16
CTNND1	LCK
TRIM69	UBE2N
TRIM69	UBE2D3
TRIM69	UBE2D1
TRIM69	UBE2H
TRIM69	UBE2E1
TRIM69	ZNF483
PML	STAT1
PML	TES
PML	TRIM22
PML	TRIM69
RND3	SFN
RND3	SKP2
RND3	UBXN11
RND3	ROCK1
ARHGAP5	RND3
NGB	PTEN
NGB	VAC14
NGB	TDO2
NGB	REL
NGB	TRIM32
GNAO1	NGB
IL1R1	LYN
IL1R1	YES1
IL1R1	SRC
IL1R1	PELI1
IL1R1	IRAK2
IL1R1	TNFRSF10B
IL1R1	MFAP3
IL1R1	TUBB8
IL1R1	TICAM2
IL1R1	TRAF6
IL1R1	IRAK1
IL1R1	IRAK4
IL1R1	TOM1
IL1R1	IL1RN
IL1R1	MYD88
IL1R1	TOLLIP
IL1R1	PIK3R1
IL1R1	IL1RAP
IL1R1	SIGIRR
EGR1	TP53BP1
EGR1	NFATC2
EGR1	WT1
EGR1	IL1B
EGR1	TBX2
EGR1	PFDN5
EGR1	SREBF2
EGR1	ERBB3
EGR1	RELA
EGR1	PSMA3
EGR1	NFATC1
EGR1	JUN
EGR1	WDFY1
EGR1	NES
EGR1	NAB1
EGR1	MIDN
EGR1	PHIP
EGR1	POP1
EGR1	MED6
EGR1	PSMD2
EGR1	MAGEB2
EGR1	JUND
EGR1	JUNB
EGR1	FOSL2
EGR1	TP53
EGR1	MDM2
EGR1	EP300
EGR1	SRA1
EGR1	PTEN
EGR1	SP1
EGR1	SNAI1
EGR1	PITX1
EGR1	NAB2
CEBPB	EGR1
HCFC1	IRF1
EGR2	SNAI1
EGR2	WWP2
EGR2	NFATC1
EGR2	SOX10
EGR2	SOX8
EGR2	PDE4DIP
EGR2	GOLGA2
EGR2	RPL7L1
EGR2	RIMKLB
EGR2	RBM15B
EGR2	NDUFS2
EGR2	HN1L
EGR2	SRA1
EGR2	NAB2
EGR2	UBE2I
EGR2	MED31
EGR2	HCFC1
IL6	IL6ST
IL6	PTHLH
IL6	ZBTB16
IL6	SH3GL2
IL6	IL6R
NOTCH2	PSEN2
NOTCH2	TGOLN2
NOTCH2	NRAS
NOTCH2	RNF4
NOTCH2	ZNF598
NOTCH2	VASN
NOTCH2	NA
NOTCH2	RDX
NOTCH2	ZFP41
NOTCH2	RABGGTB
NOTCH2	SMAD1
NOTCH2	SPEN
NOTCH2	PSEN1
NOTCH2	ST14
NOTCH2	PSMC3IP
NOTCH2	PDIA6
NOTCH2	PLAUR
NOTCH2	SIN3A
NOTCH2	TJP1
NOTCH2	PSMB1
NOTCH2	PCMT1
NOTCH2	SEC24C
NOTCH2	RBPJ
CNTN1	NOTCH2
NOTCH1	NOTCH2
NOTCH1	RND3
PIK3CA	STAT1
PIK3CA	RASGRP3
NUP214	ZFP36
RELA	TFAP2A
RELA	STAT1
RELA	SOCS3
RELA	TWIST1
RELA	UNC5CL
UNC5CL	USP22
NFKB1	ZFP36
NFKB1	TFAP2A
NFKB1	SOCS3
NFKB1	NFKBIZ
NFKB1	UNC5CL
TNFRSF10B	TNFRSF10D
TNFRSF10B	TRIM25
TNFRSF10B	TNFRSF13B
TNFRSF10B	TSPAN3
TNFRSF10B	TNFSF10
TNFRSF10B	TNFRSF1A
TNFRSF10B	VAMP3
TNFRSF10B	UGCG
TNFRSF10B	TRAF2
TNFRSF10B	TRADD
TIMM50	TNFRSF10B
RASGRP3	RFT1
RASGRP3	YWHAQ
RASGRP3	SULT1C2
PRKCD	SPRY2
PRKCD	STAT1
PRKCD	RASGRP3
CDH1	PTPRG
CDH1	FMN1
CDH1	VSIG10L
CDH1	TES
CDH1	STAT1
CDH1	NOTCH2
CDH1	KLF4
CDH1	NKD2
CDH1	MET
MET	PLCG1
MET	PIK3R1
MET	SMC1A
MET	SNX2
MET	VAV1
MET	PCBD2
MET	SNAPIN
MET	SFN
MET	PTPRO
MET	TP53
MET	RASSF1
MET	RAF1
MET	NF2
MET	MYC
MET	SCGB1D1
MET	PCBP1
MET	SRC
MET	RANBP10
MET	SH3KBP1
MET	MUC20
MET	PLXNB1
MET	PTPN11
MET	PTPRJ
MET	PTPRB
MET	TERT
MET	STK11
MET	PTEN
MET	SOCS1
MET	STUB1
MET	SPSB4
MET	SPSB3
MET	SPSB2
MET	SPSB1
MET	STAT3
MET	SOS1
MET	SHC1
MET	RANBP9
CTNNB1	HNF1B
CTNNB1	STAT1
CTNNB1	ISG15
CTNNB1	RET
CTNNB1	TES
CTNNB1	EGR1
CTNNB1	MET
CTNNB1	TFAP2A
PIK3R1	RET
PIK3R1	PTGER3
LCK	LCP2
LCK	SHC1
LCK	PLCG2
LCK	PRKCD
LCK	VAV1
LCK	NFKBIA
LCK	MED28
LCK	SH2D1A
LCK	LIME1
LCK	SH3BP2
LCK	STAT5A
LCK	MUC1
LCK	PTPRH
LCK	PTPRCAP
LCK	SMURF1
LCK	RIN3
LCK	STAT3
LCK	UBC
LCK	Mbp
LCK	PTPN22
LCK	PAK2
LCK	YWHAQ
LCK	UHRF2
LCK	RAF1
LCK	THY1
LCK	SIT1
LCK	TRPV4
LCK	NEDD9
LCK	MS4A1
LCK	SH2B3
LCK	PXN
LCK	UBE3A
LCK	PRKCQ
LCK	SH2D2A
LCK	PLD2
LCK	MAPK3
LCK	PRKACA
LCK	TUB
LCK	STAT1
LCK	PRKCA
LCK	PTPN11
LCK	PLCG1
LCK	LTB4R
LCK	NOS2
LCK	PTK6
LCK	MASP2
LCK	MAP2K7
LCK	MAP3K8
LCK	PIK3C2B
LCK	MAPK12
LCK	PTPRF
LCK	PTK2
LCK	LZTS2
LCK	WASL
LCK	SMAD3
LCK	SMAD2
LCK	MAPK1
LCK	WAS
LCK	SOCS3
LCK	SOCS2
LCK	SOCS1
LCK	SOS1
LCK	SH3KBP1
LCK	NR3C1
LCK	nef
LCK	PTPRC
LCK	PTPN6
LCK	SYK
LCK	RASA1
LCK	SQSTM1
LCK	PECAM1
LCK	ZAP70
LCK	TRAT1
LCK	PAG1
LCK	PI4KA
LCK	SKAP1
LCK	PTK2B
LCK	NOTCH1
LCK	PIK3CA
LCK	UNC119
LCK	PIK3R1
APC	TFF1
APC	CGNL1
APC	TFAP2A
TP53	TWIST1
TFAP2A	VEGFA
TFAP2A	UBN1
TFAP2A	WWP2
TFAP2A	WWP1
TFAP2A	TFAP2B
TFAP2A	XRCC5
TFAP2A	XRCC6
TFAP2A	TFAP2C
TFAP2A	TFAP2D
TFAP2A	UBE2I
TFAP2A	YY1
TFAP2A	YBX1
TFAP2A	TP53
BRCA1	EGR1
BRCA1	TFAP2A
BRCA1	PAX2
BRCA1	IFI16
BRCA1	SSX2IP
BRCA1	LCK
BRCA1	USP2
BRCA1	STAT1
BRCA1	JUNB
MYO1C	SQRDL
MYO1C	TES
MYO1C	NEK6
CDC37	LOXL4
CDC37	FKBP6
CDC37	IFIT3
CDC37	NEK6
KDELR1	NEK6
EML4	NEK6
PCID2	ZFP36L2
GCN1L1	TES
GCN1L1	NEK6
FANCI	NEK6
NUP93	TES
SLC1A5	TES
SLC1A5	TMEM132A
DYNLL1	SSX2IP
DYNLL1	IFI16
DYNLL1	NEK6
EML2	NEK6
MCM7	SSX2IP
MCM7	NEK6
LRPPRC	ZFP36L2
LRPPRC	NEK6
IPO4	TES
IPO4	NEK6
CCAR2	ZFP36L2
CCAR2	NEK6
EML3	NEK6
FBXO4	MCL1
FBXO4	PARK2
FBXO4	HSP90AA1
FBXO4	TP53
FBXO4	FBXW8
FBXO4	UBE2D2
FBXO4	Fxr2
FBXO4	Fxr1
FBXO4	Fmr1
FBXO4	YWHAE
FBXO4	TERF1
FBXO4	NEDD8
FBXO4	SKP1
CUL1	EPSTI1
CUL1	KLF4
CUL1	FBXO4
MMP14	MMP2
MMP14	SDC1
MMP14	TIMP3
MMP14	MYC
MMP14	VPS35
MMP14	TIMP4
MMP14	SPOCK1
MMP14	NOS2
MMP14	PNMT
MMP14	SLC16A8
MMP14	NPR1
MMP14	TIMP1
MMP14	MMP3
MMP14	TIMP2
MMP14	SPOCK3
MMP14	PLLP
MMP14	RRAD
STAT3	TWIST1
STAT3	TES
RET	SHC4
RET	SHANK2
RET	SGTB
RET	SYNCRIP
RET	SORT1
RET	SHC1
RET	SRC
RET	SHC3
RET	ZCCHC8
RET	TXNL4A
RET	ZBTB48
RET	STAT3
LUM	TRA2B
LUM	RSRC1
LUM	SLIT2
LUM	RHOA
LUM	PTPN11
LUM	THUMPD1
LUM	MMP14
ACAN	MMP14
ACAN	LUM
FOSL1	JUNB
KRTAP4-12	SPRY2
CCDC33	PTGER3
CCDC33	NECAB2
BEGAIN	USP2
STAT1	SYK
STAT1	STAT5B
STAT1	TNFRSF1B
STAT1	TRIM11
STAT1	YAF2
STAT1	TGFB1
STAT1	U2AF2
STAT1	TEX264
STAT1	YAP1
STAT1	VPS29
STAT1	TSNAX
STAT1	XPO1
STAT1	VCP
STAT1	UBE2I
STAT1	TRIM28
STAT1	TRADD
STAT1	TNFRSF1A
STAT1	VDR
STAT1	TYK2
STAT1	SUMO4
STAT1	ZNF467
STAT1	vif
STAT1	TES
STAT1	USP2
STAT1	TNK2
STAT1	STAT4
STAT1	STAT5A
STAT1	VPS26A
STAT1	TBCD
STAT1	USP13
STAT1	STAT3
STAT1	STAT2
EIF1AD	STAT1
IFIT3	MB21D1
IFIT3	RIOK1
IFIT3	IFNA21
IFIT3	PHACTR4
IFIT3	TPM1
IFIT3	IKBKE
IFIT3	TRADD
IFIT3	TRAF3
IFIT3	TRAF2
IFIT3	TRAF6
IFIT3	IFNA8
IFIT3	IFNA5
IFIT3	IFNA2
IFIT3	IFNA14
IFIT3	RNF32
IFIT3	PSEN2
IFIT3	MAST1
IFIT3	SAP25
IFIT3	MAVS
IFIT3	TBK1
IFIT3	TMEM183A
IFIT3	TPM3
IFIT3	TXN
IFIT3	MOV10
IFIT3	SF3B3
IFIT3	YBX3
IFIT3	SNRPC
IFIT3	SNRPD1
IFIT3	ILF3
IFIT3	PABPC4
IFIT3	PABPC1
IFIT3	SNRNP70
IFIT3	SNRPA1
IFIT3	SNRPB
IFIT3	SNRPB2
IFIT3	SNRPA
IFIT3	NCL
IFIT3	SNRPE
IFIT3	YBX1
IFIT3	SNRPD3
IFIT3	SSB
IFIT3	RBMX
IFIT3	SNRPF
IFIT3	SNRPD2
IFIT3	RAD23A
IFIT3	LONP1
IFIT3	IFIT5
IFIT3	ISG15
CCDC67	IFIT3
KANSL1	NECAB2
ADAMTSL4	PTGER3
ADAMTSL4	SPRY2
LNX1	NKD2
LNX1	NEK6
LNX1	NECAB2
GTPBP10	NECAB2
JUNB	NFE2L1
JUNB	NKX2-1
JUNB	TNIP2
JUNB	NFATC2
JUNB	NFATC1
JUNB	Rp
JUNB	NPM1
JUNB	MAPK9
JUNB	MAPK8
JUNB	SMAD4
JUNB	SMAD3
JUNB	NA
JUNB	MAPK14
JUNB	TRIB1
JUNB	NUCB2
JUNB	NDE1
JUNB	RFWD2
JUNB	STK40
JUNB	RAD18
JUNB	USP4
JUNB	NBR1
JUNB	PPP1R12A
JUNB	JUND
JUNB	USP24
JUNB	TCERG1
JUNB	MAP2
JUNB	ZNF595
JUNB	PKIA
JUNB	TDG
JUNB	SAT1
JUNB	MAPK6
JUNB	NEU1
JUNB	SET
JUNB	TCL1A
JUNB	SMURF1
JUNB	YY1
JUNB	SMARCA4
JUNB	NINL
ISG15	LRRC25
ISG15	TNK2
ISG15	SQSTM1
ISG15	USP21
ISG15	UBE2D3
ISG15	NEDD4
ISG15	SEPT2
ISG15	ZNF318
ISG15	UGP2
ISG15	PRDX6
ISG15	SFN
ISG15	TRIM25
ISG15	ZNF281
ISG15	ZC3HAV1
ISG15	YTHDC1
ISG15	XRCC5
ISG15	WDR33
ISG15	WDR1
ISG15	WARS
ISG15	VIM
ISG15	VCP
ISG15	UBE2N
ISG15	UBE2L6
ISG15	UBAP2L
ISG15	TXNRD1
ISG15	TOP2A
ISG15	TMOD3
ISG15	TKT
ISG15	TARS
ISG15	TAGLN
ISG15	STAT1
ISG15	SMAD4
ISG15	SIN3A
ISG15	SF3B4
ISG15	SF3A2
ISG15	SERPINB5
ISG15	SENP1
ISG15	RPS27A
ISG15	RPL27A
ISG15	RPL24
ISG15	RDH11
ISG15	RBBP4
ISG15	RAN
ISG15	QTRTD1
ISG15	WIBG
ISG15	PTBP1
ISG15	PSMA7
ISG15	PRDX1
ISG15	PLS3
ISG15	PLS1
ISG15	PLOD3
ISG15	PLOD1
ISG15	PLEC
ISG15	PKM
ISG15	PHGDH
ISG15	PGK1
ISG15	PGD
ISG15	PFN1
ISG15	SERBP1
ISG15	PAFAH1B1
ISG15	OGDH
ISG15	NUP43
ISG15	NFIX
ISG15	NACA
ISG15	PALLD
ISG15	MYH9
ISG15	MX1
ISG15	MSN
ISG15	MAP4
ISG15	LMNA
ISG15	LMAN2
ISG15	LGMN
ISG15	ZC3H15
ISG15	LDHA
ISG15	LAP3
ISG15	XRCC6
ISG15	MEPCE
ISG15	MYOF
ISG15	PPP1R10
ISG15	RBM15B
ISG15	YTHDF3
ISG15	TAF2
ISG15	SNRNP200
ISG15	PPM1B
ISG15	STK38
ISG15	RGS3
ISG15	UBA7
ISG15	USP18
DGCR6L	NECAB2
CCNK	NECAB2
CCNK	FKBP6
NME7	SSX2IP
FKBP6	GAPDH
FKBP6	MAP3K1
FKBP6	ZDHHC17
FKBP6	TINF2
FKBP6	PDE4A
FKBP6	MEOX2
FKBP6	TBL1X
FKBP6	TBL1XR1
FKBP6	UBE3D
FKBP6	SIPA1L1
FKBP6	PPIL2
FKBP6	PRMT3
FKBP6	PPP1R12A
FKBP6	PPP1R12B
FKBP6	RGPD5
FKBP6	HSP90AA5P
FKBP6	IK
FKBP6	SUMO1P1
FKBP6	LZTS2
FKBP6	VBP1
FKBP6	PFDN2
FKBP6	PTGES3
FKBP6	USP19
FKBP6	HSP90AA1
FKBP6	HSP90AB1
FKBP6	OSBP
FKBP6	NME7
BEND5	USP2
NECAB2	SRP1
NECAB2	PRE5
NECAB2	THP2
NECAB2	NA
NECAB2	POLR2C
NECAB2	NIP7
NECAB2	NGFRAP1
NECAB2	TTR
NECAB2	SDCBP
NECAB2	PRKAA2
NECAB2	USP7
NECAB2	RUNX1T1
NECAB2	VTA1
NECAB2	PSMA1
NECAB2	PCM1
NECAB2	ZYG11B
NECAB2	NECAB3
NECAB2	USHBP1
NECAB2	SSC5D
NECAB2	TTC25
NECAB2	SH2D4A
NECAB2	RIC8A
NECAB2	NOC4L
NECAB2	NEK6
NECAB2	RCOR3
NECAB2	TEX11
NECAB2	WDYHV1
CENPO	FOS
CENPO	NECAB2
TFF1	XRCC3
TFF1	TSG101
TFF1	UBQLN4
TFF1	ZNF250
TFF1	UBQLN1
USP2	VPS52
USP2	ZNF598
USP2	USP21
USP2	ZAP70
USP2	VCAM1
HOOK2	PTGER3
HOOK2	TNFSF13B
HOOK2	USP2
SPRY2	NA
SPRY2	TENC1
SPRY2	STK16
SPRY2	VHL
SPRY2	TRAF2
SPRY2	TES
SPRY2	TMEM14B
SPRY2	VANGL2
SPRY2	UBE2E3
SPRY2	UBE2D2
SPRY2	VANGL1
SPRY2	ZFP36
SPRY2	ZNF417
SPRY2	UBASH3B
SPRY2	ZNF587
SPRY2	TXNDC5
SPRY2	UBASH3A
SPRY2	ZDHHC17
SPRY2	USP20
SPRY2	SPRY4
SPRY2	VPS36
SPRY2	VPS25
SPRY2	UBR1
SPRY2	ZBTB16
SPRY2	ZNF266
SPRY2	TESK1
SPRY2	TRIM51
NEK6	RPS6KB1
NEK6	SGK1
NEK6	PTPRD
NEK6	NFATC1
NEK6	TNK2
NEK6	TCF4
NEK6	TRIM27
NEK6	TRIM23
NEK6	XIAP
NEK6	PIN1
NEK6	RELB
NEK6	RPS7
NEK6	TRIP4
NEK6	RBBP6
NEK6	PTN
NEK6	PRAM1
NEK6	PRDX3
NEK6	PHF1
NEK6	PAK6
NEK6	PSMD2
NEK6	RUVBL2
NEK6	PCID2
NEK6	PTPLAD1
NEK6	XPO5
NEK6	NUP93
NEK6	SLC1A5
NEK6	SMC3
NEK6	NEK7
NEK6	USP9X
NEK6	NEK9
CCDC85B	ZFP36
CCDC85B	USP2
CCDC85B	NEK6
PKD2L1	TNNI2
PKD2L1	TNNI1
PKD2L1	TNNI3
ARNT2	SSX2IP
ARNT2	NPAS4
PACSIN3	SPRY2
PACSIN1	WASF2
PACSIN1	SOS1
PACSIN1	Tmed10
PACSIN1	NA
PACSIN1	PPP2R1A
PACSIN1	POT1
PACSIN1	SYNM
PACSIN1	TRPV4
PACSIN1	TRIOBP
PACSIN1	RAI14
PACSIN1	RTKN2
PACSIN1	TPM4
PACSIN1	SPTBN1
PACSIN1	WIPF1
PACSIN1	WAS
PACSIN1	PACSIN2
PACSIN1	WASL
PACSIN1	SYNJ1
PACSIN1	PACSIN3
ARNTL	NPAS4
PROX1	RORA
PROX1	SMAD3
PROX1	ZBTB3
EP300	FOSB
EP300	HIST1H1D
EP300	TFAP2A
EP300	FOS
EP300	STAT1
EP300	KLF4
EP300	JUNB
EP300	IRF1
EP300	TWIST1
EP300	PROX1
HBEGF	NRD1
HBEGF	MMP7
HBEGF	LTBP3
HBEGF	ZBTB16
ARNT	CYP1B1
ARNT	HIST1H1D
ARNT	NPAS4
SNORD115-28	SNORD115-7
SNORD115-27	SNORD115-7
SNORD115-27	SNORD115-28
RP11-203M5.8	RP11-245P10.6
PLEKHA8P1	RP11-245P10.6
PART1	RP11-761I4.5
LINC01276	RP11-848D3.5
KRBOX1-AS1	RP11-313I2.11
HAGLROS	RP11-567G11.1
RP11-168K9.2	RP11-761I4.5
DBET	MIR8078
AL671532.1	MIR8078
AL671532.1	DBET
AL671532.1	AL671532.7
AC126281.7	MIR8078
AC126281.7	DBET
AC126281.7	AL671532.7
AC126281.7	AL671532.1
AC104777.3	MIR8078
AC104777.3	DBET
AC104777.3	AL671532.7
AC104777.3	AL671532.1
AC104777.3	AC126281.7
RP11-59D5__B.2	RP11-75I2.3
RP11-10A14.6	SNORD19B
AC010883.5	RP11-75I2.3
ZYG11A	RP11-13A1.1
ZPBP	LOC101054525
ZPBP	AC026188.1
AC068538.4	RP11-75I2.3
AC068538.4	RP11-59D5__B.2
AC068538.4	RP11-10A14.6
AC068538.4	LOC90768
AC068538.4	CTD-2002J20.1
LOC90768	RP11-59D5__B.2
TTC24	LOC90768
TTC24	AC005009.1
SNORD115-14	SNORD115-7
SNORD115-14	SNORD115-28
SNORD115-14	SNORD115-27
TNMD	SNORD115-14
CTD-2320G14.2	RP11-310H4.3
CTD-2320G14.2	RP11-21C17.1
CTD-2320G14.2	LINC01522
CTD-2320G14.2	IGFBP7-AS1
TFF1	RP11-18J9.3
RP11-25G10.2	RP3-430A16.1
LRRC37A6P	RP11-25G10.2
TFAP2A	RP11-25G10.2
TFAP2A	LRRC37A6P
AL671532.7	MIR8078
AL671532.7	DBET
TEKT4	AL671532.7
SSX2IP	LOC200772
SSX2IP	STAB2
SPRY2	TRIM69
IGFBP7-AS1	RP11-313I2.11
IGFBP7-AS1	LINC01522
IGFBP7-AS1	KRBOX1-AS1
SLC30A10	STARD9
LINC00970	LOC101928539
SFMBT2	TMEM71
SFMBT2	STARD9
SEMA3F	CH507-396I9.3
RND3	BX546479.1
RND3	AC074212.5
RERGL	TPH2
RERGL	SCIN
PXDN	RP11-469L4.1
PTPRG	LINC00403
SLC35F3	RP11-343H5.6
SLC35F3	RP11-109G23.3
SLC35F3	ARHGAP19-SLIT1
SLC35F3	TOX3
PPM1K	SLC35F3
PMP22	RP11-69I8.3
PMP22	RP11-455I9.1
PMP22	ARHGAP19-SLIT1
PMP22	TSPAN32
PMP22	SLIT1
PLA2G4A	RP11-245P10.6
PEA15	RP11-455I9.1
PEA15	RP11-310H4.3
PEA15	RP11-21C17.1
PEA15	SLC38A5
OCIAD2	SLC4A4
OCIAD2	SERTAD4
NOL6	RP11-310H4.3
NOL6	RCAN1
NKD2	SCIN
NID1	OSMR
MIR873	STPG2-AS1
NFKBIZ	MIR873
RCAN1	RP11-310H4.3
NFATC4	REEP6
NFATC4	RCAN1
NEK6	SH3PXD2A
LOC101928880	RP11-74C3.1
HCG20	IGFBP7-AS1
NMRK1	AC093901.1
MET	NMRK1
LDLRAD3	RP11-1110F20.1
THBS2	RP11-116N8.2
KCNS3	THBS2
JPH1	MTTP
JPH1	MGAT5
ARHGAP19-SLIT1	RP11-455I9.1
ARHGAP19-SLIT1	CTD-2154B17.4
SLIT1	LL21NC02-21A1.1
SLIT1	CTD-2154B17.4
SLIT1	ARHGAP19-SLIT1
SLIT1	AC026188.1
IL6	PRSS21
ISG20	CTD-2154B17.4
ISG20	ARHGAP19-SLIT1
ISG20	AC026188.1
ISG20	SLIT1
RP11-69I8.3	RP13-270P17.3
IGSF1	LOC101928539
IGSF1	RAB20
IGFBP2	RP11-343H5.6
IGFBP2	LINC00865
IGFBP2	TOX3
IGFBP2	OSMR
IFI6	RP11-288L9.1
IFI6	STAT1
IFI6	NOTCH2
SLC15A3	LOC101928134
IFITM1	RP11-74C3.1
IFITM1	RP11-388C12.1
IFITM1	IFITM4P
IFITM1	ZBP1
IFITM1	MYO10
IFITM1	MX2
IL1R1	RP11-69I8.3
IDO1	IL1R1
NOX4	RP11-1060J15.4
NOX4	AC017002.2
HS3ST2	RP11-1060J15.4
HS3ST2	NOX4
HNF1B	AC004538.3
HNF1B	MYH6
HIST1H1D	HIST1H2BH
HBEGF	TWIST1
GPR148	RP11-848D3.5
GPR148	RAB20
FREM2	MRGPRD
FOXF1	AP005530.2
FKBP6	LOC102724958
FKBP6	PACSIN1
CTA-384D8.31	RP11-168K9.2
FAM81A	CTA-384D8.31
ZFP36L2	RP11-75I2.3
ZFP36L2	AC068538.4
FAM65B	ZFP36L2
FOSB	KLF4
JUNB	RP11-1105G2.4
EGR2	RP11-1105G2.4
EGR2	JUNB
EGR2	FOSB
EGR2	FOS
EGR1	EGR2
BX546479.1	RP11-310H4.3
BX546479.1	MIR8078
TMEM132A	CTD-2320G14.2
STARD9	AC074212.5
STARD9	TMEM132A
NGB	BX546479.1
NGB	AC074212.5
NGB	REEP6
NGB	PAX2
EAF2	RP11-310H4.3
EAF2	LOC101929260
EAF2	BX546479.1
EAF2	AC074212.5
EAF2	TMEM132A
EAF2	STARD9
EAF2	NGB
ZFP36	RP11-288L9.4
KLF4	ZFP36
DUSP1	ZFP36
DUSP1	KLF4
AC005009.1	RP11-626E13.1
AC005009.1	RP11-479G22.8
DNAI2	RP11-626E13.1
DNAI2	AC005009.1
EPSTI1	RP11-388C12.1
EPSTI1	TRIM22
EPSTI1	LRRTM4
EPSTI1	IFI16
DDX60L	TRIM22
DDX60L	EPSTI1
DAB1	LOC102724321
TRNP1	LOC101928134
SLC38A5	RP11-310H4.3
SLC38A5	TRNP1
PAX2	RP11-21C17.1
PAX2	LOC101928134
PAX2	TRNP1
PAX2	SLC38A5
PAX2	RHCE
PAX2	PEA15
MYH6	RP11-310H4.3
MYH6	RP11-116N8.2
CYR61	RP11-310H4.3
CYR61	RP11-21C17.1
CYR61	RP11-109G23.3
CYR61	TRNP1
CYR61	SLC38A5
CYR61	PAX2
CYR61	MYH6
IFI27	MX2
CYP1B1	IFI27
CXCL10	OAS1
CXCL10	MMP14
CXCL10	GIMAP2
IL20	TNFRSF10C
IL20	ISG20
CST3	IL20
TMEM71	TXK
CSF2RB	TMEM71
CREG2	AC074212.5
CREG2	LRRC8C
MGAT5	LINC01522
MGAT5	HCG20
CREG1	MGAT5
KCNK5	LOC101928134
CPXM1	TOX3
CPXM1	KCNK5
COL3A1	DPP10-AS1
LRRTM4	ZBP1
CNPY1	LOC102724321
RP11-109G23.3	RP11-21C17.1
GNB3	RP11-109G23.3
GNB3	LOC101928134
GNB3	TRNP1
GNB3	SLC38A5
CHN2	RP11-109G23.3
CHN2	LOC101928134
CHN2	GNB3
UBE2QL1	CTD-2515H24.2
FBXO4	UBE2QL1
FBXO4	TRIM69
CGNL1	LL21NC02-21A1.1
CGNL1	CTD-2515H24.2
CGNL1	UBE2QL1
CGNL1	SLC4A4
CGNL1	PACSIN1
CGNL1	FBXO4
MYCL	RP11-247C2.2
IFI16	LOC101928134
IFI16	TRIM22
IFI16	SLC15A3
IFI16	LRRTM4
IFI16	IFITM1
CFB	RP11-247C2.2
CFB	TRIM22
CFB	MYCL
CFB	IFI16
CFB	HERC6
CEMIP	KIF3C
CDHR3	ZNF727
SCIN	TPH2
CD69	SCIN
SIGLEC1	LINC00970
SIGLEC1	TMTC4
LCK	NLRC3
GBP5	RP11-345J18.2
GBP5	LCK
CD48	SIGLEC1
CD48	GBP5
CCL3L1	CCL4
CCL3	CCL3L1
RP11-310H4.3	RP11-455I9.1
RP11-21C17.1	RP11-455I9.1
RP11-21C17.1	RP11-310H4.3
CTD-2154B17.4	RP11-69I8.3
CTD-2154B17.4	RP11-479G22.8
CTD-2154B17.4	RP11-21C17.1
CARD6	RP11-310H4.3
CARD6	RP11-21C17.1
CARD6	CTD-2154B17.4
SLC2A9	ZFP36L2
C8orf46	RP11-254F7.3
C8orf46	SLC2A9
MTTP	AC004160.4
C3orf70	PTGER3
C3orf70	MTTP
C3orf36	RP11-345J18.2
TOX3	RP11-343H5.6
C11orf53	RP11-343H5.6
C11orf53	LINC00865
C11orf53	TOX3
IFITM4P	RP11-388C12.1
STAT1	RP11-567G11.1
STAT1	RP11-288L9.1
SP110	RP11-388C12.1
SP110	IFITM4P
SP110	UBQLNL
SP110	STAT1
OAS1	STAT1
OAS1	RTP4
MX2	RP11-567G11.1
MX2	LOC101928880
MX2	IFITM4P
MX2	ZBP1
MX2	STAT1
MX2	SP110
ISG15	IFITM4P
ISG15	SP110
ISG15	MX2
IFIT3	RP11-155G14.6
IFIT3	IFITM4P
IFIT3	STAT1
IFIT3	SP110
IFI44L	SLC26A4-AS1
IFI44L	RP11-288L9.1
IFI44L	IFIT3
HERC6	RP11-155G14.6
HERC6	IFITM4P
HERC6	UBQLNL
HERC6	TRIM22
HERC6	STAT1
HERC6	SP110
HERC6	MX2
HERC6	ISG15
HERC6	IFIT3
HERC6	IFI44L
DDX60	RP11-155G14.6
DDX60	TRIM22
DDX60	STAT1
DDX60	IFIT3
DDX60	HERC6
BST2	RP11-155G14.6
BST2	IFITM4P
BST2	STAT1
BST2	SP110
BST2	OAS1
BST2	MX2
BST2	ISG15
BST2	IFIT3
BST2	IFI44L
BST2	HERC6
BST2	DDX60
COL24A1	LRRTM4
COL24A1	KCNJ6
COL24A1	GPNMB
BRINP3	TPH2
BRINP3	GPNMB
BRINP3	COL24A1
TRPM1	RP11-371M22.1
BDH2	TRPM1
TRIM69	RP11-402C9.1
TRIM69	ZNF728
STAB2	LOC200772
STAB2	ZNF728
STAB2	TRIM69
SLC4A4	IGFBP7-AS1
SLC4A4	TRIM69
SERTAD4	PCDH9-AS3
ATP8A1	RP11-402C9.1
ATP8A1	ZNF728
ATP8A1	TRIM69
ATP8A1	STAB2
ATP8A1	SLC4A4
ATP8A1	SERTAD4
ARHGAP28	SATB2
ARHGAP28	REEP6
ARG2	RP11-254F7.3
APOL3	HNMT
SLC16A6	LL21NC02-21A1.1
SLC16A6	AC026188.1
SLC16A6	TRIM22
PACSIN1	LL21NC02-21A1.1
PACSIN1	CTD-2515H24.2
PACSIN1	UBE2QL1
ITM2C	CTD-2515H24.2
ITM2C	UBE2QL1
ITM2C	PACSIN1
APOL1	CTD-2515H24.2
APOL1	SLC16A6
APOL1	PACSIN1
APOL1	ITM2C
APOBEC3A	MMP14
HGD	RP11-761I4.5
ANXA2	HGD
ANG	RNASE4
ADH1C	RP11-83B20.2
ADH1C	C1S
ADH1A	RP11-83B20.2
ADH1A	C1S
ADH1A	ADH1C
SQRDL	LINC01203
REEP6	SQRDL
KCNJ6	RP1-249I4.2
KCNJ6	TNFRSF10C
KCNJ6	SQRDL
KCNJ6	REEP6
KCNJ6	LRRTM4
ADGRB1	RP11-615I2.1
ADGRB1	RP11-479G22.8
ADGRB1	LINC01203
ADGRB1	SQRDL
ADGRB1	REEP6
ADGRB1	KCNJ6
NOTCH2	RP11-1105G2.4
NOTCH2	RTP4
ADD2	RP11-1105G2.4
ADD2	NOTCH2
DNAH17	MYH6
ADCY9	RP11-241G9.3
ADCY9	DNAH17
ADARB2	TNFSF13B
ETS1	FOS
CCL2	CCR1
KIR2DL3	LCK
DAPP1	LCK
ITK	LCK
ADRA1B	STAT1
HSF2	HSF2BP
CSF2	CSF2RB
TH1L	TXK
AKD1	PEA15
PANK4	PEA15
BAT3	CHN2
NR5A1	PROX1
ADI1	MMP14
OLIG2	SOX10
PRRX2	SOX10
HOXC4	SOX10
PRRX1	SOX10
POU3F3	SOX10
HOXA3	SOX10
ALX4	SOX10
HHEX	SOX10
DLX5	SOX10
MEOX1	SOX10
MAML3	NOTCH2
MAML2	NOTCH2
LAX1	LCK
GRAP	LCK
ID1	IFI16
ID2	PAX2
ID2	IFI16
ID3	IFI16
CCL26	CCR1
FLT1	STAT1
AKAP5	RET
MAP3K3	RCAN1
PRKAR2A	RET
C4B	CFB
COL13A1	NID1
COL1A2	LUM
COL2A1	LOXL4
NFIC	TLX1
RBP4	RPE65
NR5A2	PROX1
MUC1	SIGLEC1
CIB1	IFI6
GKN2	TFF1
CNR1	MET
GDNF	RET
PTGER1	PTGER3
BACE1	ITM2C
CALML3	MYO10
DBC1	SMPDL3A
ROBO1	SLIT2
ROBO1	SLIT1
[truncated: 4,935 more rows]
